# Supplementary material for: Malvidin and Its Mono- and Di-Glucosides Forms: A Study of Combining Both In Vitro and Molecular Docking Studies Focused on Cholinesterase, Butyrylcholinesterase, COX-1 and COX-2 Activities
Source: MDPI journal article supplement (doi:10.3390/molecules28237872), 2023-11-30

# Malvidin and its mono- and di-glucosides forms: a study of combining both *in vitro* and molecular docking studies focused on cholinesterase, butyrylcholinesterase, COX-1 and COX-2 activities

Paulina Strugała-Danak<sup>1,\*</sup>, Maciej Spiegel<sup>2,\*</sup> and Janina Gabrielska<sup>1</sup>

Department of Physics and Biophysics, Wrocław University of Environmental and Life Sciences, C. K. Norwida 25, 50-375 Wrocław, Poland; janina.gabrielska@upwr.edu.pl

<sup>2</sup> Department of Organic Chemistry and Pharmaceutical Technology, Wrocław Medical University, Borowska 211A, 50-556 Wrocław, Poland; maciej.spiegel@umw.edu.pl

\* Correspondence: paulina.strugala@upwr.edu.pl ; Tel.: +48-71-320-5295, maciej.spiegel@umw.edu.pl

**Figure S1.** Radius of gyration, RMSD and RMSF calculated for the backbone atoms of the complexes with COX-1.

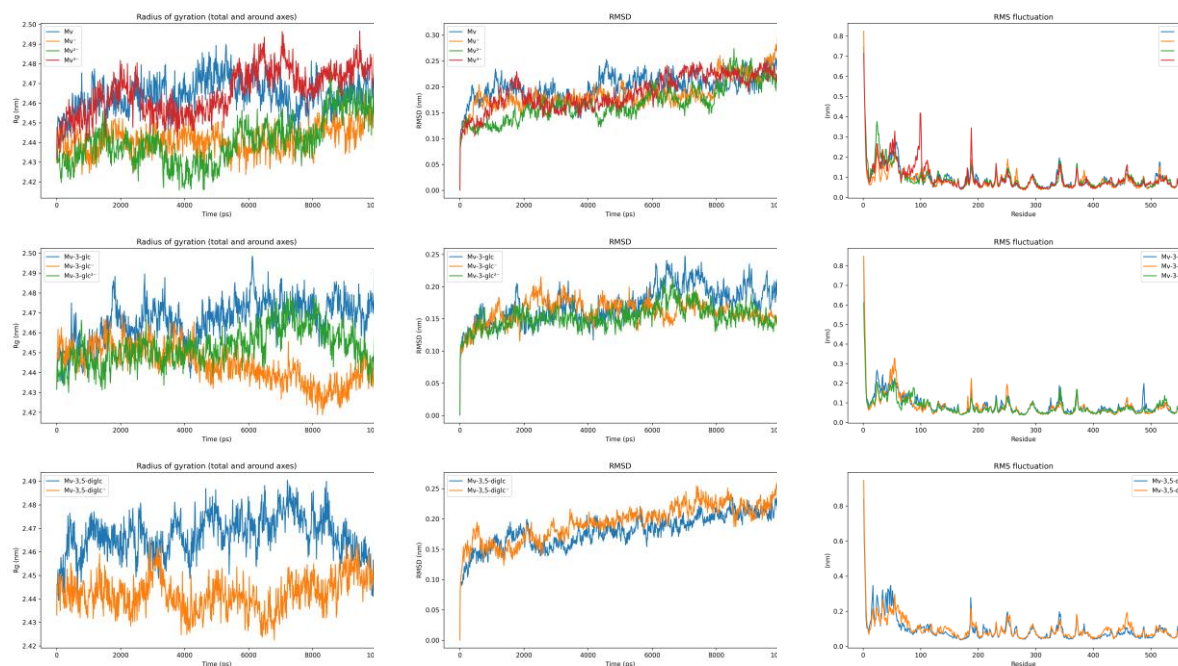

**Figure S2.** Radius of gyration, RMSD and RMSF calculated for the backbone atoms of the complexes with COX-2.

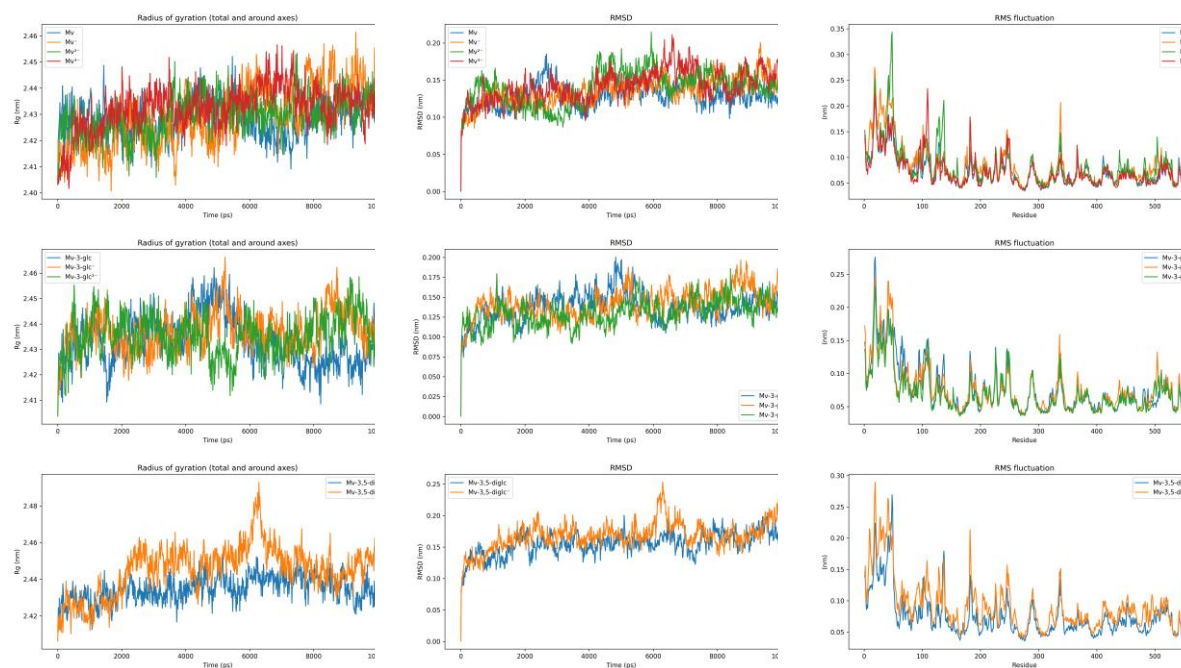

**Figure S3.** Radius of gyration, RMSD and RMSF calculated for the backbone atoms of the complexes with AChE.

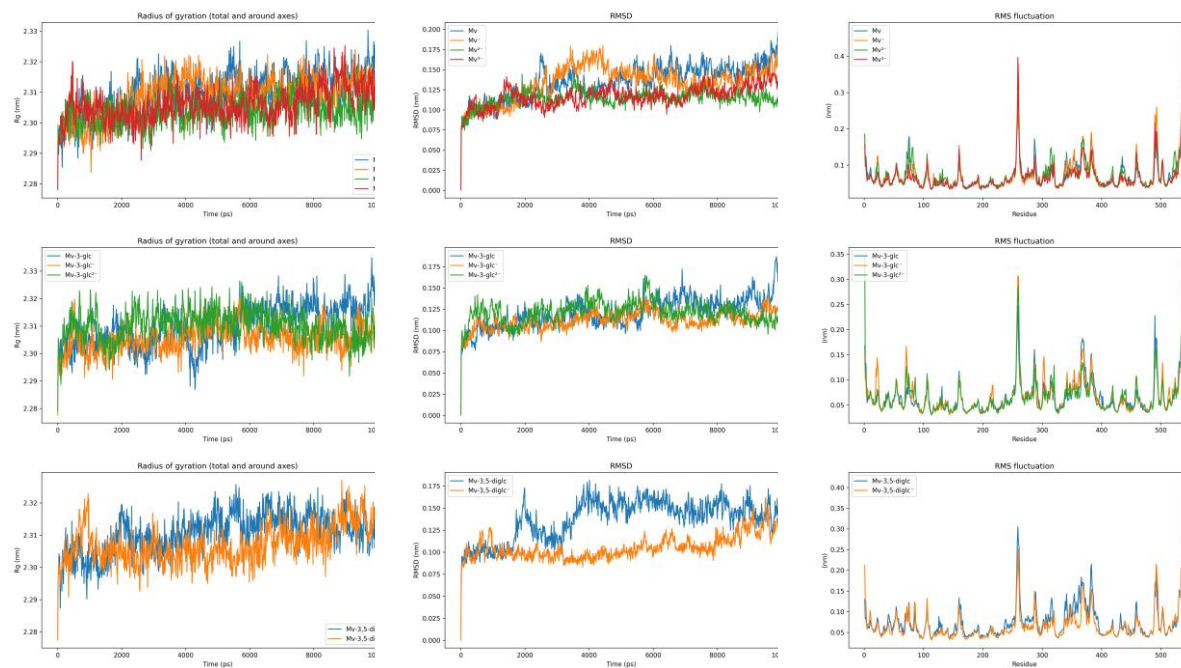

**Figure S4.** Radius of gyration, RMSD and RMSF calculated for the backbone atoms of the complexes with BChE.

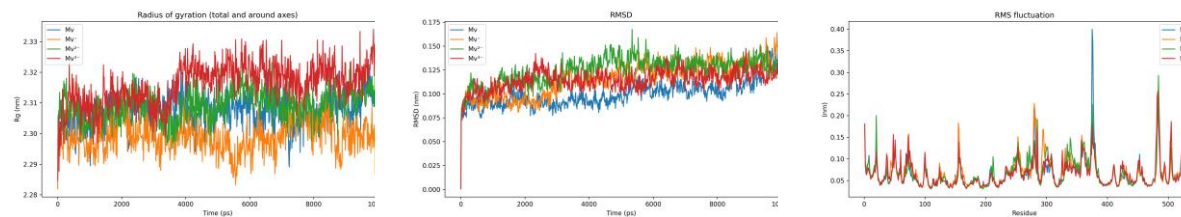

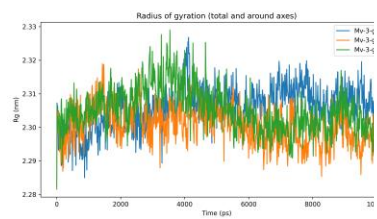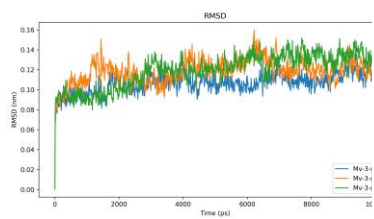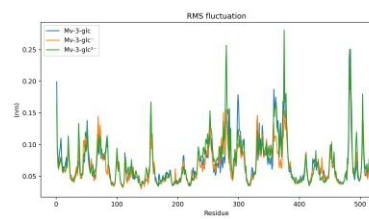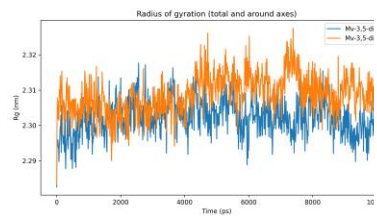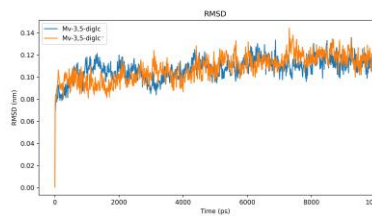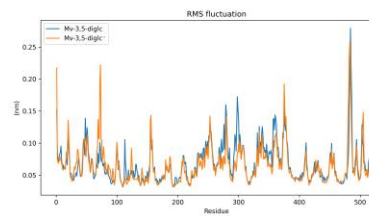

Supplement: s1 [file s1]
